# Supplementary material for: Nationwide participation in FIT-based colorectal cancer screening in Denmark during the COVID-19 pandemic: An observational study
Source: eLife. 2023 Jan 25;12:e81808. doi: 10.7554/eLife.81808 (PMC10202451; doi:10.7554/eLife.81808)
Supplement: Supplementary file 1. [file elife-81808-supp1.xlsx]

## Sheet: Ark1
Supplementary File 1 Table 1. Participation in colorectal cancer screening (%) in Denmark within 90 days since invitation from 2018 to 2021
	Pre-pandemic (01Jan2018-31Jan2020)	Pre-lockdown (01Feb2020-10Mar2020)	1st lockdown (11Mar2020-15Apr2020)	1st re-opening (16Apr2020-15Dec2020)	2nd lockdown (16Dec2020-27Feb2021)	2nd re-opening (28Feb2021-30Sep2021)
	%	%	%	%	%	%
Total	60.6921	54.8774	52.9692	62.4174	62.9935	64.866
Sex
Men	55.9669	49.4812	50.7182	57.5779	58.3458	60.0102
Women	65.3202	60.2895	55.0501	67.1099	67.5818	69.5481
Age at invitation
50-54 years	54.2615	45.2143	56.0229	51.8483	53.1869	56.6696
55-59 years	57.2264	50.2411	60.1324	62.2986	64.6677	64.433
60-64 years	62.2299	56.609	61.6251	63.9323	63.8838	66.0277
65-69 years	67.1549	62.6546	64.7429	68.485	68.998	70.8398
70-74 years	66.7496	65.01	47.2179	69.6262	69.9428	72.3468
Ethnicity
Danish descent	61.5625	55.7357	53.5252	63.2321	64.2775	66.7877
Descendant of immigrant	54.4679	50.2959	44.6154	56.9402	58.0986	60.778
Western Immigrant	53.5403	47.6489	47.5945	54.2294	57.8845	59.3469
Non-western immigrant	50.8012	45.5163	47.0956	54.0528	56.1928	57.8831
Cohabitation status
Living alone	49.5245	43.5972	43.011	51.0946	51.82	54.7744
Co-habiting/co-living	55.278	49.9122	52.9007	57.1967	58.7512	61.0576
Married/registered partner	67.5163	61.9946	59.3	69.354	70.5524	72.4207
Educational level (ISCED)
ISCED15 level 1-2	58.2219	52.5299	52.8129	60.2607	60.3985	62.7619
ISCED15 level 3-5	64.0664	58.5353	53.0235	65.6985	66.6864	68.2548
ISCED15 level 6-8	65.1314	58.8593	55.2331	66.8572	68.2604	69.1491
Disposable income
Lowest quintile	54.7085	49.4659	46.1415	55.6523	56.6008	59.0418
Second quintile	56.677	51.504	46.2173	57.8835	58.113	60.5713
Third quintile	61.9121	55.8008	55.0327	63.1331	62.9952	65.5358
Fourth quintile	64.9944	58.9287	60.7046	66.5864	66.8247	68.1557
Highest quintile	64.9955	57.898	63.0795	67.2887	68.2472	69.2294
Healthcare usage
Rare	49.5201	42.8542	44.8649	51.1355	50.9657	52.3857
Low	59.9694	54.4869	54.2121	61.9161	62.3449	63.7732
Average	63.9561	58.1711	56.0392	65.9976	66.3774	68.2535
High	65.713	60.6344	55.8672	67.4636	68.154	70.372
Frequent	65.263	60.4112	53.0798	67.2433	68.0424	70.3037
ISCED=International Standard Classification of Education
