# Supplementary material for: Nationwide participation in FIT-based colorectal cancer screening in Denmark during the COVID-19 pandemic: An observational study
Source: eLife. 2023 Jan 25;12:e81808. doi: 10.7554/eLife.81808 (PMC10202451; doi:10.7554/eLife.81808)
Supplement: Supplementary file 2. [file elife-81808-supp2.xlsx]

## Sheet: Ark1
							Supplementary File 2 Table 2. Baseline characteristics of first-time invitees invited to participate in colorectal cancer screening in Denmark 2018-2021*
								Pre-pandemic (01Jan2018-31Jan2020)	Pre-lockdown (01Feb2020-10Mar2020)	1st lockdown (11Mar2020-15Apr2020)	1st re-opening (16Apr2020-15Dec2020)	2nd lockdown (16Dec2020-27Feb2021)	2nd re-opening (28Feb2021-30Sep2021)	Total
								N (%)	N (%)	N (%)	N (%)	N (%)	N (%)	N (%)
							Total	148704 (53.8)	8278 (3.0)	6779 (2.5)	54328 (19.6)	14358 (5.2)	44048 (15.9)	276495 (100.0)
							Sex
							Men	75340 (50.7)	4188 (50.6)	3327 (49.1)	27269 (50.2)	7303 (50.9)	22161 (50.3)	139588 (50.5)
							Women	73364 (49.3)	4090 (49.4)	3452 (50.9)	27059 (49.8)	7055 (49.1)	21887 (49.7)	136907 (49.5)
							Age at invitation
							50-54 years	144126 (96.9)	8034 (97.1)	6673 (98.4)	52708 (97.0)	13903 (96.8)	42728 (97.0)	268172 (97.0)
							55-59 years	1817 (1.2)	108 (1.3)	13 (0.2)	663 (1.2)	180 (1.3)	570 (1.3)	3351 (1.2)
							60-64 years	1221 (0.8)	62 (0.7)	5 (0.1)	436 (0.8)	118 (0.8)	317 (0.7)	2159 (0.8)
							65-69 years	882 (0.6)	47 (0.6)	12 (0.2)	306 (0.6)	88 (0.6)	260 (0.6)	1595 (0.6)
							70-74 years	658 (0.4)	27 (0.3)	76 (1.1)	215 (0.4)	69 (0.5)	173 (0.4)	1218 (0.4)
							Median (IQI)	50 (50; 50)	50 (50; 50)	50 (50; 50)	50 (50; 50)	50 (50; 50)	50 (50; 50)	50 (50; 50)
							Ethnicity
							Danish descent	127132 (85.7)	6941 (84.1)	5567 (82.3)	45931 (84.7)	2540 (84.2)	N/A	188111 (85.3)
							Western immigrant	6920 (4.7)	481 (5.8)	279 (4.1)	2913 (5.4)	157 (5.2)	N/A	10750 (4.9)
							Non-western immigrant	14023 (9.5)	812 (9.8)	903 (13.3)	5254 (9.7)	311 (10.3)	N/A	21303 (9.7)
							Cohabitation status
							Living alone	47755 (32.2)	2660 (32.2)	2181 (32.2)	17518 (32.3)	949 (31.5)	N/A	71063 (32.2)
							Co-habiting/co-living	19413 (13.1)	1074 (13.0)	857 (12.7)	7263 (13.4)	408 (13.5)	N/A	29015 (13.2)
							Married/registered partner	81146 (54.7)	4518 (54.8)	3729 (55.1)	29469 (54.3)	1658 (55.0)	N/A	120520 (54.6)
							Educational level (ISCED)
							ISCED15 level 1-2	93443 (64.0)	5229 (64.1)	4316 (64.9)	34039 (64.2)	9030 (65.3)	27169 (64.5)	173226 (64.2)
							ISCED15 level 3-5	37534 (25.7)	2046 (25.1)	1676 (25.2)	13166 (24.8)	3408 (24.6)	10521 (25.0)	68351 (25.3)
							ISCED15 level 6-8	15086 (10.3)	885 (10.8)	659 (9.9)	5827 (11.0)	1393 (10.1)	4440 (10.5)	28290 (10.5)
							Disposable income
							Lowest quintile	21311 (14.4)	1015 (12.6)	901 (13.4)	6618 (12.5)	1737 (12.4)	4817 (11.3)	36399 (13.4)
							Second quintile	18355 (12.4)	962 (11.9)	918 (13.6)	6109 (11.6)	1567 (11.1)	4554 (10.7)	32465 (11.9)
							Third quintile	29964 (20.2)	1601 (19.8)	1260 (18.7)	10453 (19.8)	2484 (17.7)	7164 (16.8)	52926 (19.4)
							Fourth quintile	37041 (25.0)	2049 (25.4)	1720 (25.5)	13595 (25.8)	3516 (25.0)	10949 (25.7)	68870 (25.3)
							Highest quintile	41551 (28.0)	2439 (30.2)	1946 (28.9)	15997 (30.3)	4757 (33.8)	15162 (35.6)	81852 (30.0)
							Healthcare usage
							Rare	45423 (30.5)	2947 (35.6)	2287 (33.7)	19872 (36.6)	5191 (36.2)	15825 (35.9)	91545 (33.1)
							Low	32255 (21.7)	1512 (18.3)	1281 (18.9)	10297 (19.0)	2755 (19.2)	8314 (18.9)	56414 (20.4)
							Average	31566 (21.2)	1657 (20.0)	1366 (20.2)	10473 (19.3)	2789 (19.4)	8525 (19.4)	56376 (20.4)
							High	21804 (14.7)	1154 (13.9)	987 (14.6)	7458 (13.7)	2002 (13.9)	6137 (13.9)	39542 (14.3)
							Frequent	17656 (11.9)	1008 (12.2)	858 (12.7)	6228 (11.5)	1621 (11.3)	5247 (11.9)	32618 (11.8)
							Time - invitation to participation, median (IDI)	38 (17; 92)	44 (16; 107)	41 (17; 86)	38 (17; 87)	35 (17; 81)	31 (17; 74)	37 (17; 88)
							* IQI = interquartile interval; IDI = interdecentile interval; ISCED = International Standard Classification of Education; Information on cohabitation status was only available from Statistics Denmark until the end of February 2021, whereas all other socioeconomic variables were available until end of the study period.
