# Supplementary material for: Nationwide participation in FIT-based colorectal cancer screening in Denmark during the COVID-19 pandemic: An observational study
Source: eLife. 2023 Jan 25;12:e81808. doi: 10.7554/eLife.81808 (PMC10202451; doi:10.7554/eLife.81808)
Supplement: Supplementary file 3. [file elife-81808-supp3.xlsx]

## Sheet: Ark1
Supplementary File 3 Table 3. Prevalence ratios (PR) and 95% confidence intervals (CI) of participation in colorectal cancer screening within 90 days since invitation in Denmark among first-time invitees 2018-2021*
		Pre-pandemic (01Jan2018-31Jan2020)		Pre-lockdown (01Feb2020-10Mar2020)		1st lockdown (11Mar2020-15Apr2020)		1st re-opening (16Apr2020-15Dec2020)		2nd lockdown (16Dec2020-27Feb2021)		2nd re-opening (28Feb2021-30Sep2021)
		N=148704		N=8278		N=6779		N=54328		N=14358		N=44048
	N	PR	[95%CI]	PR	[95%CI]	PR	[95%CI]	PR	[95%CI]	PR	[95%CI]	PR	[95%CI]
Overall	276495	1	-	0.953258	[0.93; 0.98]	1.06018	[1.03; 1.09]	0.984426	[0.97; 1.00]	1.03085	[1.01; 1.06]	1.00514	[0.98; 1.03]
Sex
Men	139588	1	-	0.924444	[0.89; 0.96]	1.08079	[1.05; 1.12]	1.00411	[0.99; 1.02]	1.04339	[1.02; 1.07]	1.027	[1.01; 1.04]
Women	136907	1	-	0.949071	[0.92; 0.98]	1.0323	[1.00; 1.06]	0.995891	[0.98; 1.01]	1.01118	[0.99; 1.03]	1.0112	[1.00; 1.02]
Age at invitation
50-54 years	268172	1	-	0.956219	[0.93; 0.98]	1.05848	[1.03; 1.09]	0.990406	[0.97; 1.01]	1.03539	[1.01; 1.06]	1.01594	[0.99; 1.04]
55-59 years	3351	1	-	0.762823	[0.52; 1.11]	0.445399	[0.12; 1.69]	0.935609	[0.75; 1.16]	1.15712	[0.83; 1.61]	1.05047	[0.77; 1.43]
60-64 years	2159	1	-	0.826135	[0.57; 1.20]	0.96972	[0.32; 2.98]	0.853985	[0.68; 1.07]	0.794928	[0.57; 1.11]	0.785871	[0.57; 1.08]
65-69 years	1595	1	-	0.957556	[0.65; 1.41]	0.602683	[0.26; 1.39]	0.955612	[0.75; 1.22]	0.943931	[0.66; 1.36]	0.948687	[0.67; 1.34]
70-74 years	1218	1	-	1.04729	[0.67; 1.64]	1.03368	[0.70; 1.52]	1.03826	[0.79; 1.37]	0.88305	[0.60; 1.30]	0.842032	[0.57; 1.24]
Ethnicity
Danish descent	188111	1	-	0.962018	[0.93; 0.99]	1.05166	[1.02; 1.08]	0.981169	[0.96; 1.00]	1.01061	[0.97; 1.05]	N/A	N/A
Western immigrant	10750	1	-	1.01001	[0.86; 1.18]	1.11227	[0.95; 1.31]	1.03102	[0.93; 1.14]	1.1368	[0.93; 1.39]	N/A	N/A
Non-western immigrant	21303	1	-	0.943051	[0.85; 1.05]	1.10283	[1.00; 1.21]	1.00615	[0.94; 1.07]	1.08906	[0.96; 1.24]	N/A	N/A
Cohabitation status
Living alone	71063	1	-	0.94039	[0.88; 1.00]	1.04978	[0.99; 1.11]	0.950821	[0.92; 0.99]	0.978616	[0.90; 1.06]	N/A	N/A
Co-habiting/co-living	29015	1	-	1.01785	[0.93; 1.11]	1.08829	[1.00; 1.18]	1.00393	[0.95; 1.06]	1.03172	[0.92; 1.15]	N/A	N/A
Married/registered partner	120520	1	-	0.955134	[0.92; 0.99]	1.05382	[1.02; 1.09]	0.995038	[0.97; 1.02]	1.03295	[0.99; 1.08]	N/A	N/A
Educational level (ISCED)
ISCED15 level 1-2	173226	1	-	0.9583	[0.93; 0.99]	1.06067	[1.02; 1.10]	0.987713	[0.97; 1.01]	1.03749	[1.01; 1.07]	1.01599	[0.98; 1.05]
ISCED15 level 3-5	68351	1	-	0.922552	[0.87; 0.97]	1.04262	[0.99; 1.10]	0.965755	[0.93; 1.00]	1.03143	[0.98; 1.08]	0.990558	[0.94; 1.04]
ISCED15 level 6-8	28290	1	-	0.977875	[0.90; 1.06]	1.11565	[1.03; 1.21]	1.02271	[0.97; 1.08]	1.02552	[0.95; 1.11]	1.06158	[0.98; 1.15]
Disposable income
Lowest quintile	36399	1	-	0.997744	[0.90; 1.11]	1.16391	[1.05; 1.29]	1.00901	[0.95; 1.07]	1.08793	[0.99; 1.19]	1.02077	[0.93; 1.12]
Second quintile	32465	1	-	1.01025	[0.92; 1.11]	1.07471	[0.98; 1.18]	1.02017	[0.96; 1.08]	1.04511	[0.96; 1.14]	1.09332	[1.00; 1.19]
Third quintile	52926	1	-	0.97742	[0.92; 1.04]	1.09339	[1.03; 1.16]	0.999453	[0.96; 1.04]	1.03057	[0.97; 1.09]	1.01504	[0.96; 1.08]
Fourth quintile	68870	1	-	0.935906	[0.89; 0.98]	1.04544	[1.00; 1.10]	0.982024	[0.95; 1.01]	0.9974	[0.95; 1.04]	0.980439	[0.94; 1.03]
Highest quintile	81852	1	-	0.94177	[0.90; 0.98]	1.03926	[0.99; 1.09]	0.992613	[0.97; 1.02]	1.04234	[1.00; 1.08]	1.00805	[0.97; 1.05]
Healthcare usage
Rare	91545	1	-	0.921987	[0.87; 0.97]	1.03513	[0.98; 1.09]	0.957743	[0.92; 0.99]	1.01285	[0.96; 1.07]	0.960633	[0.91; 1.01]
Low	56414	1	-	0.985228	[0.93; 1.05]	1.12544	[1.06; 1.19]	1.01358	[0.98; 1.05]	1.04658	[0.99; 1.10]	1.06143	[1.01; 1.12]
Average	56376	1	-	0.953363	[0.90; 1.01]	1.02554	[0.97; 1.08]	0.987843	[0.95; 1.02]	1.01454	[0.96; 1.07]	0.978178	[0.93; 1.03]
High	39542	1	-	0.987023	[0.92; 1.06]	1.05629	[0.99; 1.13]	1.01054	[0.97; 1.05]	1.03622	[0.98; 1.10]	1.0558	[0.99; 1.12]
Frequent	32618	1	-	0.969044	[0.90; 1.04]	1.08985	[1.02; 1.17]	0.99204	[0.95; 1.04]	1.07776	[1.01; 1.15]	1.00419	[0.94; 1.07]
* Adjusted for year, month and age at invitation; PR=prevalence ratio; CI=confidence interval; ISCED=International Standard Classification of Education; Information on cohabitation status was only available from Statistics Denmark until the end of February 2021, whereas all other socioeconomic variables were available until end of the study period.
