# Supplementary material for: Nationwide participation in FIT-based colorectal cancer screening in Denmark during the COVID-19 pandemic: An observational study
Source: eLife. 2023 Jan 25;12:e81808. doi: 10.7554/eLife.81808 (PMC10202451; doi:10.7554/eLife.81808)
Supplement: Supplementary file 4. [file elife-81808-supp4.xlsx]

## Sheet: Ark1
Supplementary File 4 Table 4. Compliance with colonoscopy (%) in Denmark within 60 days since a positive FIT test from 2018 to 2021
	Pre-pandemic (01Jan2018-31Jan2020)	Pre-lockdown (01Feb2020-10Mar2020)	1st lockdown (11Mar2020-15Apr2020)	1st re-opening (16Apr2020-15Dec2020)	2nd lockdown (16Dec2020-27Feb2021)	2nd re-opening (28Feb2021-30Sep2021)
	%	%	%	%	%	%
Total	89.9264	87.5935	85.2161	88.79	89.374	88.165
Sex
Men	90.0435	87.141	84.6591	88.8017	88.8889	87.453
Women	89.7865	88.0851	85.8537	88.7768	89.9137	88.9471
Age at invitation
50-54 years	89.9167	92.7835	89.1892	90.1721	89.3617	87.8999
55-59 years	90.2859	87.1122	82.8026	88.8575	89.6679	89.3171
60-64 years	90.1576	89.6947	93.5897	89.4022	89.8	88.0395
65-69 years	90.1864	88.3721	91.8919	88.4005	89.9571	87.9155
70-74 years	89.3301	83.9726	82.9949	87.7215	88.4344	88.1888
Ethnicity
Danish descent	90.3309	88.3364	85.9951	89.1759	89.8855	88.6372
Western immigrant	86.294	75.7576	72.973	82.732	83.0769	84.4371
Non-western immigrant	83.9456	79.2857	77.0492	83.9947	86.7704	81.7742
Cohabitation status
Living alone	85.6544	81.4697	79.4816	83.8486	85.8682	83.8601
Co-habiting/co-living	90.4283	89.6104	88.6364	90.7771	90.2552	87.1745
Married/registered partner	92.0086	90.6268	88.2812	90.9652	91.3381	90.3449
Educational level (ISCED)
ISCED15 level 1-2	89.4277	88.6493	83.6364	88.3289	89.3022	87.4717
ISCED15 level 3-5	90.4937	87.6908	86.7562	89.7056	89.7745	89.3849
ISCED15 level 6-8	90.9989	85.2273	88.3721	89.5221	90.5556	89.1958
Disposable income
Lowest quintile	87.6635	83.6331	81.3084	85.5954	87.422	85.4897
Second quintile	87.7494	83.3333	79.2023	86.1885	87.2007	85.3419
Third quintile	90.3855	88.8158	87.6068	88.6013	88.0038	89.0278
Fourth quintile	92.2895	90.1582	90.9524	91.2075	92.543	90.7457
Highest quintile	92.6222	93.2302	93.1034	92.5434	91.8312	90.5718
Healthcare usage
Rare	90.8315	88.0196	86.9565	90.295	90.1299	87.4409
Low	91.2071	88.1818	88.8889	90.9437	90.036	90.1891
Average	91.1652	90.9539	84.6154	90.0378	90.7054	88.9834
High	90.2301	88.5587	86.9888	87.7784	88.4547	89.1818
Frequent	87.4364	83.7438	82.5328	86.2731	88.1988	85.9873
ISCED = International Standard Classification of Education
